# Supplementary material for: Socioeconomic Inequalities in Green Space Quality and Accessibility—Evidence from a Southern European City
Source: Int J Environ Res Public Health. 2017 Aug 15;14(8):916. doi: 10.3390/ijerph14080916 (PMC5580619; doi:10.3390/ijerph14080916)
Supplement: Supplementary file 1 [file ijerph-14-00916-s001.pdf]

# Supplementary Materials: Socioeconomic Inequalities in Green Space Quality and Accessibility—Evidence from a Southern European City

Elaine Hoffmann, Henrique Barros and Ana Isabel Ribeiro \*

**Table S1.** Included and excluded items and recodification criteria.

| Item                                                                                                                                                                                                             | Status                                                                   | Recodification                                                                                                                                         |
|------------------------------------------------------------------------------------------------------------------------------------------------------------------------------------------------------------------|--------------------------------------------------------------------------|--------------------------------------------------------------------------------------------------------------------------------------------------------|
| General information                                                                                                                                                                                              |                                                                          |                                                                                                                                                        |
| 1.Reference                                                                                                                                                                                                      | Excluded                                                                 | -                                                                                                                                                      |
| 2. Address                                                                                                                                                                                                       | Excluded                                                                 | -                                                                                                                                                      |
| 3.Area                                                                                                                                                                                                           | Included                                                                 | Dichotomized according to the median value<br>1 = larger<br>0 = smaller                                                                                |
| 4.Postcode                                                                                                                                                                                                       | Excluded                                                                 | -                                                                                                                                                      |
| 5.Geocode (X,Y)                                                                                                                                                                                                  | Excluded                                                                 | -                                                                                                                                                      |
| 6. Year of establishment of POS:                                                                                                                                                                                 | Excluded (24% missing info)                                              | -                                                                                                                                                      |
| Domain: Activities                                                                                                                                                                                               |                                                                          |                                                                                                                                                        |
| 7. Type of usage                                                                                                                                                                                                 | Included                                                                 | 1 = active formal/informal use<br>0 = passive use only                                                                                                 |
| 8. For what type of activities is the space designed?                                                                                                                                                            | Included                                                                 | Sum of the number of offered activities and then dichotomized according to the median value:<br>1 = $\geq 2$<br>0 = $\leq 1$                           |
| 49. To what extent do you agree or disagree with each of the following statements regarding this POS?<br>POS is interesting for walking<br>POS is suitable for casual ball sports<br>POS is suitable for cycling | Included                                                                 | Level of appropriateness to physical activities<br>Sum of the Likert scale and then dichotomized according to the median value:<br>0 = low<br>1 = high |
| Domain: Environmental Quality                                                                                                                                                                                    |                                                                          |                                                                                                                                                        |
| 9. Is the POS on the beach/river foreshore?                                                                                                                                                                      | Excluded<br>(could artificially overestimate socioeconomic inequalities) | -                                                                                                                                                      |
| 10. Are there water features within the POS?                                                                                                                                                                     | Included                                                                 | Not required                                                                                                                                           |
| 11.Type of water feature                                                                                                                                                                                         | Included                                                                 | Sum of the number of water features and then dichotomized according to the median value:<br>1 = $\geq 2$<br>0 = 1                                      |
| 12. Estimate the percentage of the POS occupied by the water feature(s)?                                                                                                                                         | Excluded<br>(all green spaces had up to 25%)                             | -                                                                                                                                                      |
| 13a. Are there other aesthetic features in the POS?                                                                                                                                                              | Included                                                                 | Not required                                                                                                                                           |

|                                                                     |                                                    |                                                                                                                                                                                                                                                                                                                                                                      |
|---------------------------------------------------------------------|----------------------------------------------------|----------------------------------------------------------------------------------------------------------------------------------------------------------------------------------------------------------------------------------------------------------------------------------------------------------------------------------------------------------------------|
| 13b. Which of the following features are present?                   | Included                                           | Sum of the number of aesthetic features and then dichotomized according to the median value:<br><br>1 = $\geq 2$<br>0 = 1                                                                                                                                                                                                                                            |
| 14. Are there trees in this POS?                                    | Excluded<br>(all green spaces had trees)           | -                                                                                                                                                                                                                                                                                                                                                                    |
| 15. Estimate the approximate number of trees present                | Included                                           | A measure of tree density was computed according to a classification matrix based on the green space size (terciles of area) and number of trees, as follows:<br>0 = large size areas with 1-100 trees plus medium size areas with 1-50 trees.<br>1 = large size areas with more than 100 trees plus medium size areas with more than 50 trees plus small size areas |
| 16. Where are the trees placed?                                     | Excluded (unpredictable impact in green space use) | -                                                                                                                                                                                                                                                                                                                                                                    |
| 17. Are there gardens in this POS?                                  | Included                                           | Not required                                                                                                                                                                                                                                                                                                                                                         |
| 18a. Are there walking paths or cycleways within or around the POS? | Included                                           | 1 = paths (walking or dual use)<br>0 = no paths                                                                                                                                                                                                                                                                                                                      |
| 18b. Shade along paths                                              | Included                                           | 1 = very good, good or medium<br>0 = no paths / poor or very poor                                                                                                                                                                                                                                                                                                    |
| 19. Describe the placement of paths within the POS                  | Excluded (unpredictable impact in green space use) | -                                                                                                                                                                                                                                                                                                                                                                    |
| 20. Is there evidence that the grass is watered?                    | Included                                           | Not required                                                                                                                                                                                                                                                                                                                                                         |
| 21. Are dogs allowed?                                               | Included                                           | 1 = Yes (at all times, at certain times or not specified)<br>0 = No                                                                                                                                                                                                                                                                                                  |
| 22. Is access for dogs:                                             | Excluded (unpredictable impact in green space use) | -                                                                                                                                                                                                                                                                                                                                                                    |
| 23. Is graffiti present?                                            | Included                                           | 1 = No<br>0 = Yes                                                                                                                                                                                                                                                                                                                                                    |
| 24. Is vandalism evident?                                           | Included                                           | 1 = No<br>0 = Yes                                                                                                                                                                                                                                                                                                                                                    |
| 25. Is there litter throughout the POS?                             | Included                                           | 1 = No<br>0 = Yes                                                                                                                                                                                                                                                                                                                                                    |
| Domain: Amenities                                                   |                                                    |                                                                                                                                                                                                                                                                                                                                                                      |
| 26. Is children's play equipment present?                           | Included                                           | Not required                                                                                                                                                                                                                                                                                                                                                         |
| 27. What items of play equipment are present?                       | Included                                           | Sum of the number of play equipment features and then dichotomized according to the median value:<br>1 = $\geq 6$<br>0 = $\leq 5$                                                                                                                                                                                                                                    |
| 28. What is the playground surface?                                 | Excluded (unpredictable impact in green space use) | -                                                                                                                                                                                                                                                                                                                                                                    |

|                                                                                                      |                                                    |                                                           |
|------------------------------------------------------------------------------------------------------|----------------------------------------------------|-----------------------------------------------------------|
| 29. Is playground shaded?                                                                            | Excluded (all were shaded)                         | -                                                         |
| 30. Are barbecues present?                                                                           | Excluded (absent in all green spaces)              | -                                                         |
| 31. Are picnic tables present?                                                                       | Included                                           | Not required                                              |
| 32a. Are there parking facilities serving the POS?                                                   | Included                                           | Not required                                              |
| 32b. Estimate the number of bays                                                                     | Excluded (proportional to the park size)           | -                                                         |
| 33. Are there public access toilets?                                                                 | Included                                           | Not required                                              |
| 34. Is there a kiosk/café present?                                                                   | Included                                           | 1 = 7 days per week/weekdays only/weekends only<br>0 = No |
| 35. Is there access to public transport within one block of POS?                                     | Excluded (present in all green spaces)             | -                                                         |
| 36. Is there seating present?                                                                        | Included                                           | Not required                                              |
| 37. Are there clubrooms/meeting rooms present?                                                       | Included                                           | Not required                                              |
| 38. Are rubbish bins present?                                                                        | Included                                           | Not required                                              |
| 39. Are dog litter bags provided?                                                                    | Included                                           | Not required                                              |
| 40. In how many locations in POS are dog litter bags present?                                        | Excluded (proportional to the park size)           | -                                                         |
| 41. Are there taps or other water sources accessible for dogs?                                       | Excluded (absent in all green spaces)              | -                                                         |
| 42. Are drinking fountains present?                                                                  | Included                                           | Not required                                              |
| Domain: Safety                                                                                       |                                                    |                                                           |
| 43. Is there lighting within the POS? (i.e., not just street lighting)                               | Included                                           | Not required                                              |
| 44. Where is the lighting located?                                                                   | Excluded (unpredictable impact in green space use) | -                                                         |
| 45. From the centre of the POS, how visible are surrounding roads?                                   | Included                                           | 1 = clearly or partially visible<br>0 = not visible       |
| 46a. From the centre of the POS, how visible are the surrounding houses?                             | Included                                           | 1 = clearly or partially visible<br>0 = not visible       |
| 46b. How many of these houses overlook the park?                                                     | Excluded                                           | -                                                         |
| 46c. Is there any area of the POS where you are unable to clearly see surrounding houses?            | Excluded                                           | -                                                         |
| 47. Are all roads surrounding the POS minor roads or cul-de-sacs?                                    | Included                                           | Not required                                              |
| 48a. Does the major road/s have a zebra crossing to assist access to the POS?                        | Excluded (present in all green spaces)             | -                                                         |
| 48b. Does the major road/s have a pedestrian crossing with signals to assist with access to the POS? | Excluded (present in all green spaces)             | -                                                         |

**Table S2.** Sensitivity analysis (400 m distance threshold).

(A) Measures of green space geographic accessibility and quality according to neighbourhood deprivation quintiles (descriptive statistics).

| Variables                                                                            | All<br>(N = 2064) | Q1<br>(N = 612) | Q2<br>(N = 137) | Q3<br>(N = 286) | Q4<br>(N = 284) | Q5<br>(N = 745) |
|--------------------------------------------------------------------------------------|-------------------|-----------------|-----------------|-----------------|-----------------|-----------------|
| Geographic accessibility                                                             |                   |                 |                 |                 |                 |                 |
| Green spaces within 400 m (yes)                                                      | 1012 (49.0)       | 347 (56.7)      | 74 (54.0)       | 147 (51.4)      | 133 (46.8)      | 311 (41.7)      |
| No. of green spaces within 400 m (mean, SD)                                          | 0.69 (0.90)       | 0.83 (0.98)     | 1.10 (1.37)     | 0.61 (0.66)     | 0.62 (0.78)     | 0.56 (0.79)     |
| Distance (in hm) to greenspaces within 400 m (median, IQR)                           | 2.25 (1.79)       | 2.01 (1.72)     | 2.31 (1.90)     | 1.87 (1.97)     | 2.31 (1.66)     | 2.47 (1.46)     |
| Area of greenspace within 400 m per inhabitant (m <sup>2</sup> /inhab) (median, IQR) | 0.00 (1.76)       | 0.25 (2.84)     | 0.20 (2.85)     | 0.00 (1.78)     | 0.00 (1.44)     | 0.00 (0.80)     |
| Green space quality scores                                                           |                   |                 |                 |                 |                 |                 |
| Activities (mean, SD)                                                                | 1.86 (0.95)       | 1.95 (0.87)     | 1.60 (0.77)     | 1.87 (0.94)     | 2.02 (0.92)     | 1.76 (1.08)     |
| Environmental quality (mean, SD)                                                     | 8.86 (2.11)       | 8.69 (2.16)     | 8.34 (1.49)     | 9.42 (2.94)     | 9.45 (2.22)     | 8.77 (1.62)     |
| Amenities (mean, SD)                                                                 | 4.76 (2.24)       | 4.99 (2.20)     | 4.21 (1.60)     | 4.82 (2.12)     | 5.09 (2.74)     | 4.53 (2.24)     |
| Safety (mean, SD)                                                                    | 2.88 (0.95)       | 3.06 (0.98)     | 3.23 (0.56)     | 2.94 (0.75)     | 2.41 (1.17)     | 2.69 (0.89)     |
| Total (mean, SD)                                                                     | 18.36 (3.79)      | 18.69 (3.69)    | 17.38 (2.88)    | 19.06 (4.73)    | 18.97 (3.81)    | 17.75 (3.58)    |
| Total domain weighted (mean, SD)                                                     | 7.81 (1.77)       | 8.10 (1.67)     | 7.46 (1.62)     | 8.18 (1.88)     | 7.90 (1.58)     | 7.39 (1.88)     |

SD = standard deviation; IQR = interquartile range.

(B) Association between green space geographic accessibility and quality and neighbourhood deprivation quintiles (univariable and multivariable ordinal regression).

| Variables                                                               | Odds ratio (95%CI) <sup>a</sup><br>Univariable | Odds ratio (95%CI)<br>Multivariable |
|-------------------------------------------------------------------------|------------------------------------------------|-------------------------------------|
| Geographic accessibility                                                |                                                |                                     |
| Green spaces within 400 m (yes)                                         | 0.634 (0.542, 0.742) *                         |                                     |
| No. of green spaces within 400 m                                        | 0.758 (0.694, 0.829) *                         | 0.860 (0.743, 0.996) *              |
| Distance (hm) to accessible green spaces                                | 1.269 (1.145, 1.405) *                         | 1.288 (1.161, 1.429) *              |
| Area of green space within 400 m per inhabitant (m <sup>2</sup> /inhab) | 0.996 (0.994, 0.999) *                         |                                     |
| Quality scores                                                          |                                                |                                     |
| Activities                                                              | 0.875 (0.771, 0.994) *                         |                                     |
| Environmental quality                                                   | 0.975 (0.925, 1.027)                           | 0.939 (0.884, 0.996) *              |
| Amenities                                                               | 0.929 (0.881, 0.978) *                         | 0.857 (0.807, 0.910) *              |
| Safety                                                                  | 0.714 (0.634, 0.804) *                         | 0.586 (0.507, 0.678) *              |

<sup>a</sup> odds ratio and 95% confidence intervals; \*  $p < 0.05$ .

**Table S3.** Correlation matrix (Kendall's tau-b correlation coefficient) of the green space characteristics: (A) Quality scores; (B) Geographic accessibility.

| Quality Scores              | Activities Score           | Environmental Quality Score | Amenities Score            | Safety Score               | Geographic Accessibility                                               | Green Spaces within 800m (yes) | No. of Green Spaces within 800m | Distance (m) to Green Spaces within 800m | Area of Green Space within 800m per Inhabitant (m <sup>2</sup> /inhab) |
|-----------------------------|----------------------------|-----------------------------|----------------------------|----------------------------|------------------------------------------------------------------------|--------------------------------|---------------------------------|------------------------------------------|------------------------------------------------------------------------|
| Activities score            | 1.000                      | 0.168<br><i>p</i> < 0.001   | 0.432<br><i>p</i> < 0.001  | −0.189<br><i>p</i> < 0.001 | Green spaces within 800m (yes)                                         | 1.000                          | 0.624<br><i>p</i> < 0.001       | –                                        | 0.602<br><i>p</i> < 0.001                                              |
| Environmental quality score | 0.168<br><i>p</i> < 0.001  | 1.000                       | 0.235<br><i>p</i> < 0.001  | −0.370<br><i>p</i> < 0.001 | No. of green spaces within 800m                                        | 0.624<br><i>p</i> < 0.001      | 1.000                           | 0.053<br><i>p</i> = 0.003                | 0.539<br><i>p</i> < 0.001                                              |
| Amenities score             | 0.432<br><i>p</i> < 0.001  | 0.235<br><i>p</i> < 0.001   | 1.000                      | −0.193<br><i>p</i> < 0.001 | Distance (m) to green spaces within 800m                               | –                              | 0.053<br><i>p</i> = 0.003       | 1.000                                    | −0.027<br><i>p</i> = 0.127                                             |
| Safety score                | −0.189<br><i>p</i> < 0.001 | −0.370<br><i>p</i> < 0.001  | −0.193<br><i>p</i> < 0.001 | 1.000                      | Area of green space within 800m per inhabitant (m <sup>2</sup> /inhab) | 0.602<br><i>p</i> < 0.001      | 0.539<br><i>p</i> < 0.001       | −0.027<br><i>p</i> = 0.127               | 1.000                                                                  |

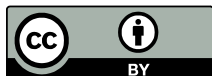

© 2017 by the authors; licensee MDPI, Basel, Switzerland. This article is an open access article distributed under the terms and conditions of the Creative Commons by Attribution (CC-BY) license (<http://creativecommons.org/licenses/by/4.0/>).
